# Supplementary material
Source: PubMed Central journal article supplement (PMC6784974)

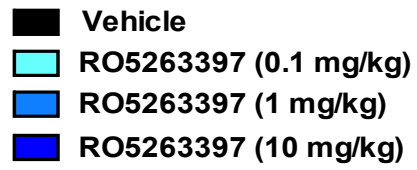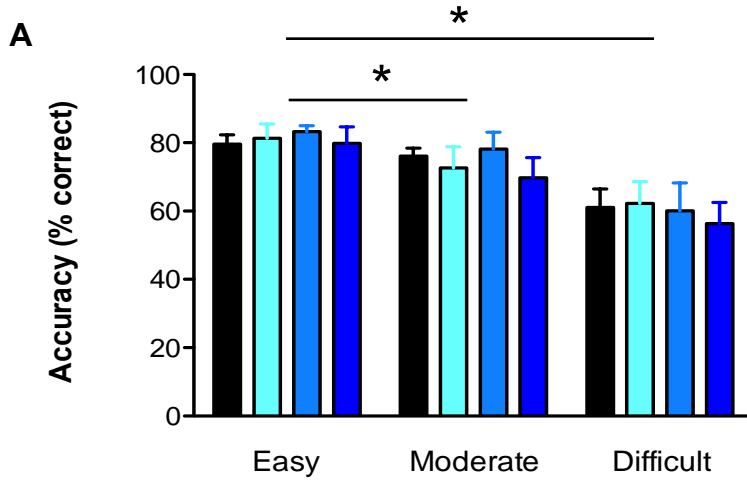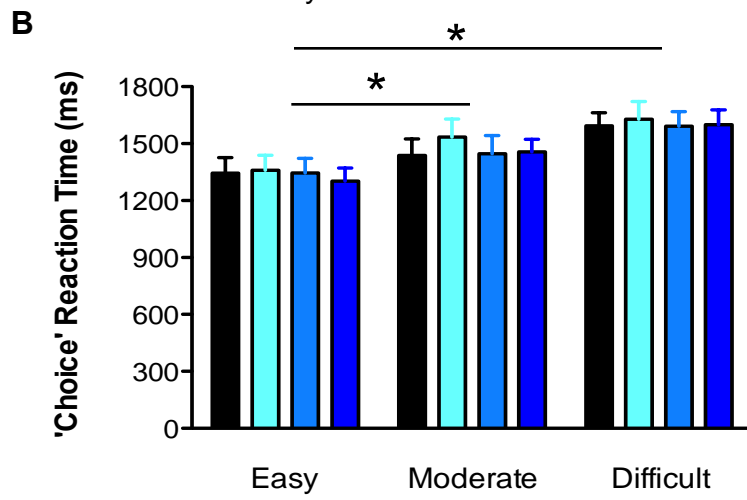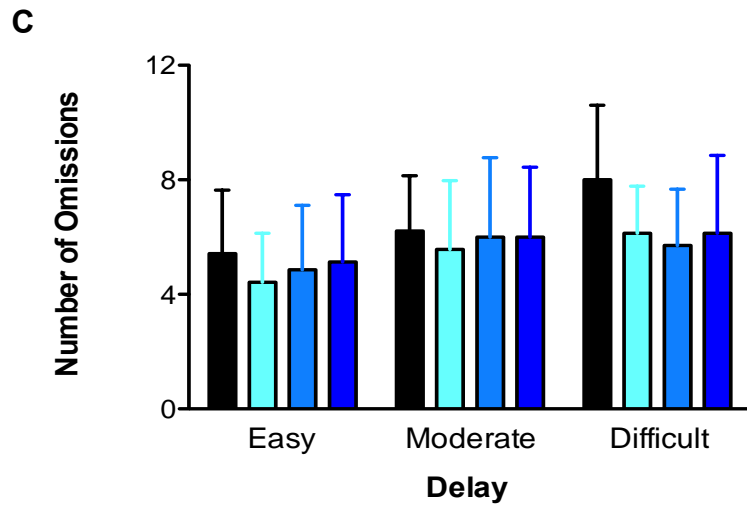

Supplement: 41386_2019_386_MOESM1_ESM.pdf [file 41386_2019_386_MOESM1_ESM.pdf]

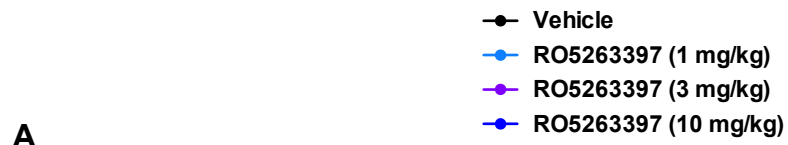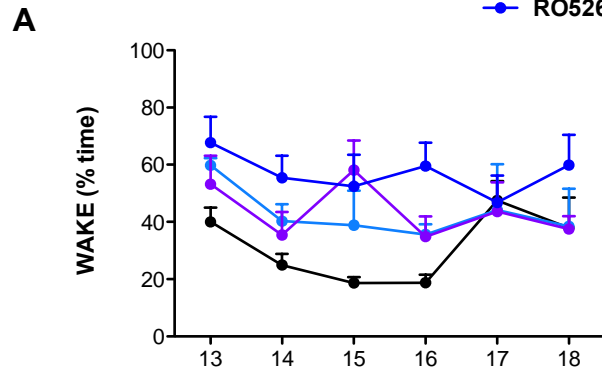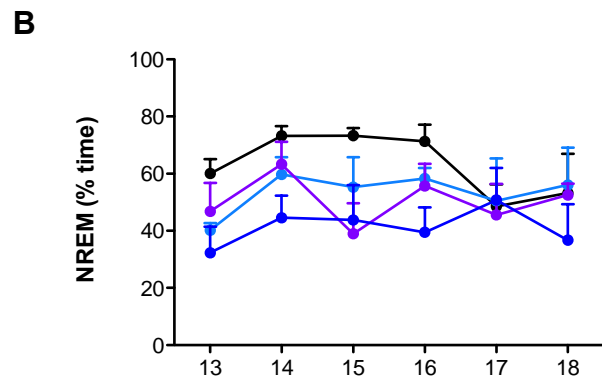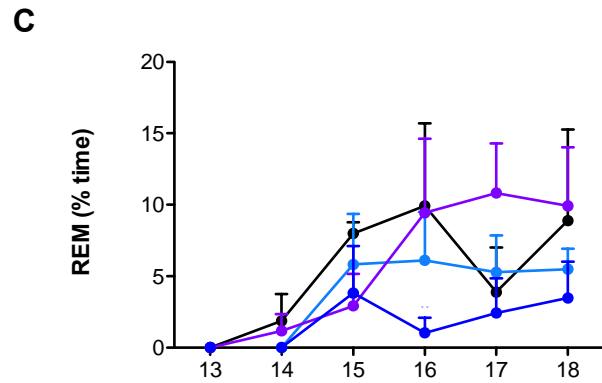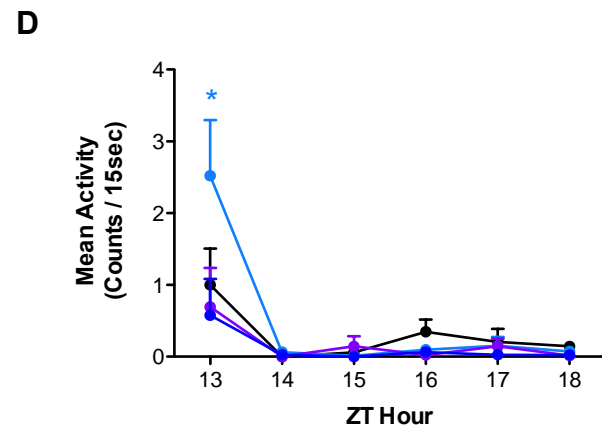

Supplement: 41386_2019_386_MOESM2_ESM.pdf [file 41386_2019_386_MOESM2_ESM.pdf]
